# Supplementary material for: Association of Life’s Simple 7 and ideal cardiovascular health in American Indians/Alaska Natives
Source: HighWire-hosted journal article supplement (doi:10.1136/openhrt-2022-002222), 2023-04-01
Supplement: openhrt-2022-002222supp001_data_supplement.pdf [file openhrt-2022-002222supp001_data_supplement.pdf]

Supplemental Table 1. Distribution of cardiovascular disease outcomes in the analytic sample.

| <b>Cardiovascular Diseases</b> | <b>Total (N)</b> | <b>Frequency (%)</b> |
|--------------------------------|------------------|----------------------|
| Stroke                         | 8,460            | 364 (4.3)            |
| Coronary heart disease         | 8,419            | 421 (5.0)            |
| Myocardial infarction          | 8,439            | 512 (6.1)            |

Supplemental Table 2. Distribution of participants in the poor, intermediate, and ideal composite LS7 score categories.

| <b>LS7 metrics</b> | <b>Frequency (%)</b> | <b>CVD Outcome(s) (%)</b> |
|--------------------|----------------------|---------------------------|
| Poor               | 675 (11.23)          | 260 (38.5)                |
| Intermediate       | 2,319 (38.59)        | 520 (22.4)                |
| Ideal              | 3,016 (50.18)        | 248 (8.2)                 |

Supplemental Table 3a. Associations between social determinants of health and individual LS7 metrics.

**Smoking**

| <b>Social Determinants of Health</b>     | <b>Crude OR (95% CI)</b> | <b>P-value</b> | <b>*Adjusted OR (95% CI)</b> | <b>P-value</b> |
|------------------------------------------|--------------------------|----------------|------------------------------|----------------|
| Health insurance                         | 1.22 (1.04-1.44)         | 0.012          | 1.05 (0.87-1.26)             | 0.574          |
| Regular healthcare provider              | 1.42 (1.27-1.57)         | 0.007          | 1.23 (1.09-1.39)             | 0.141          |
| No avoidance of medical care due to cost | 1.51 (1.33-1.71)         | 0.000          | 1.32 (0.73-1.08)             | 0.066          |

**Low Physical Activity**

| <b>Social Determinants of Health</b>     | <b>Crude OR (95% CI)</b> | <b>P-value</b> | <b>*Adjusted OR (95% CI)</b> | <b>P-value</b> |
|------------------------------------------|--------------------------|----------------|------------------------------|----------------|
| Health insurance                         | 1.07 (0.90-1.26)         | 0.425          | 1.09 (0.90-1.33)             | 0.341          |
| Regular healthcare provider              | 0.88 (0.79-0.98)         | 0.032          | 1.02 (0.90-1.16)             | 0.663          |
| No avoidance of medical care due to cost | 1.28 (1.13-1.46)         | 0.00           | 1.89 (1.73-1.98)             | 0.055          |

**Elevated Body Mass Index**

| <b>Social Determinants of Health</b>     | <b>Crude OR (95% CI)</b> | <b>P-value</b> | <b>*Adjusted OR (95% CI)</b> | <b>P-value</b> |
|------------------------------------------|--------------------------|----------------|------------------------------|----------------|
| Health insurance                         | 0.70 (0.59-0.83)         | 0.001          | 0.74 (0.61-0.90)             | 0.053          |
| Regular healthcare provider              | 0.89 (0.80-1.04)         | 0.061          | 1.26 (1.06-1.49)             | 0.391          |
| No avoidance of medical care due to cost | 0.97 (0.84-1.11)         | 0.706          | 0.92 (0.78-1.07)             | 0.286          |

**Poor Diet**

| <b>Social Determinants of Health</b>     | <b>Crude OR (95% CI)</b> | <b>P-value</b> | <b>*Adjusted OR (95% CI)</b> | <b>P-value</b> |
|------------------------------------------|--------------------------|----------------|------------------------------|----------------|
| Health insurance                         | 1.05 (0.84-1.30)         | 0.635          | 1.06 (0.75-1.23)             | 0.776          |
| Regular healthcare provider              | 1.21 (1.06-1.39)         | 0.005          | 1.12 (0.95-1.31)             | 0.288          |
| No avoidance of medical care due to cost | 1.08 (0.91-1.28)         | 0.347          | 1.10 (0.91-1.33)             | 0.168          |

**Diabetes**

| <b>Social Determinants of Health</b>     | <b>Crude OR (95% CI)</b> | <b>P-value</b> | <b>*Adjusted OR (95% CI)</b> | <b>P-value</b>      |
|------------------------------------------|--------------------------|----------------|------------------------------|---------------------|
| Health insurance                         | 1.57 (1.46-1.71)         | 0.002          | 1.59 (1.46-1.77)             | <0.001 <sup>a</sup> |
| Regular healthcare provider              | 1.45 (1.39-1.51)         | 0.000          | 1.58 (1.50-1.68)             | <0.001 <sup>a</sup> |
| No avoidance of medical care due to cost | 1.23 (1.07-1.41)         | 0.003          | 1.13 (0.96-1.32)             | 0.026 <sup>a</sup>  |

**High Cholesterol**

| <b>Social Determinants of Health</b>     | <b>Crude OR (95% CI)</b> | <b>P-value</b> | <b>*Adjusted OR (95% CI)</b> | <b>P-value</b>      |
|------------------------------------------|--------------------------|----------------|------------------------------|---------------------|
| Health insurance                         | 1.63 (1.51-1.77)         | 0.001          | 1.68 (1.53-1.86)             | 0.001 <sup>a</sup>  |
| Regular healthcare provider              | 1.41 (1.36-1.47)         | 0.000          | 1.51 (1.44-1.59)             | 0.011 <sup>a</sup>  |
| No avoidance of medical care due to cost | 1.68 (1.47-1.92)         | 0.016          | 1.72 (1.48-2.01)             | <0.001 <sup>a</sup> |

| <b>Hypertension</b>                      |                          |                |                              |                     |
|------------------------------------------|--------------------------|----------------|------------------------------|---------------------|
| <b>Social Determinants of Health</b>     | <b>Crude OR (95% CI)</b> | <b>P-value</b> | <b>*Adjusted OR (95% CI)</b> | <b>P-value</b>      |
| Health insurance                         | 1.66 (1.56-1.78)         | 0.004          | 1.69 (1.57-1.84)             | <0.001 <sup>a</sup> |
| Regular healthcare provider              | 1.48 (1.43-1.53)         | 0.000          | 1.59 (1.53-1.67)             | 0.006 <sup>a</sup>  |
| No avoidance of medical care due to cost | 1.45 (1.28-1.63)         | 0.000          | 1.50 (1.31-1.73)             | 0.003 <sup>a</sup>  |

\*Adjusted for gender, age, marital status, income, and education; OR=odds ratio; CI=confidence interval; <sup>a</sup> indicates factors found to be statistically significant.

Supplemental Table 3b. Associations between sociodemographic characteristics and Life's Simple 7 (LS7) composite score.

| <b>Sociodemographic characteristics</b> | <b>Bivariate analysis OR (95% CI)</b> | <b>P-value</b>      | <b>Multivariate analysis OR (95% CI)</b> | <b>P-value</b>      |
|-----------------------------------------|---------------------------------------|---------------------|------------------------------------------|---------------------|
| <b>Age</b>                              |                                       |                     |                                          |                     |
| 18-24                                   | referent                              | referent            | referent                                 | referent            |
| 45-64                                   | 0.31 (0.26-0.37)                      | <0.001 <sup>a</sup> | 0.13 (0.09-0.20)                         | <0.001 <sup>a</sup> |
| ≥65                                     | 0.24 (0.20-0.30)                      | <0.001 <sup>a</sup> | 0.11 (0.07-0.17)                         | <0.001 <sup>a</sup> |
| <b>Sex</b>                              |                                       |                     |                                          |                     |
| Female                                  | referent                              | referent            | referent                                 | referent            |
| Male                                    | 0.87 (0.76-0.99)                      | 0.043               | 0.77 (0.67-0.88)                         | <0.001 <sup>a</sup> |
| <b>Marital status</b>                   |                                       |                     |                                          |                     |
| Not married                             | referent                              | referent            | referent                                 | referent            |
| Married                                 | 1.23 (1.07-1.41)                      | 0.002 <sup>a</sup>  | 1.10 (0.94-1.28)                         | 0.207               |
| <b>Education</b>                        |                                       |                     |                                          |                     |
| College                                 | referent                              | referent            | referent                                 | referent            |
| High school or less                     | 0.52 (0.46-0.60)                      | <0.001 <sup>a</sup> | 0.67 (0.58-0.77)                         | <0.001 <sup>a</sup> |
| <b>Income</b>                           |                                       |                     |                                          |                     |
| ≥ 50,000                                | referent                              | referent            | referent                                 | referent            |
| <15,000                                 | 0.30 (0.24-0.37)                      | 0.001 <sup>a</sup>  | 0.37 (0.29-0.48)                         | referent            |
| 25,000-34,999                           | 0.40 (0.32-0.50)                      | <0.05 <sup>a</sup>  | 0.45 (0.35-0.56)                         | 0.001 <sup>a</sup>  |
| 35,000-49,999                           | 0.49 (0.38-0.65)                      | <0.001 <sup>a</sup> | 0.51 (0.39-0.68)                         | <0.001 <sup>a</sup> |

OR=odds ratio; CI =confidence interval; <sup>a</sup> indicates statistically significant.

Table 4a. Relationships of Life's Simple 7 composite score levels and myocardial infarction (MI).

| <b>LS7 Metrics</b>  | <b>MI Cases</b> | <b>Crude OR (95% CI)</b> | <b>P-value</b>      | <b>*Adjusted OR (95% CI)</b> | <b>P-value</b>      |
|---------------------|-----------------|--------------------------|---------------------|------------------------------|---------------------|
| <b>Poor</b>         | 174/664         | referent                 | referent            | referent                     | referent            |
| <b>Intermediate</b> | 311/2,294       | 0.44 (0.36-0.54)         | <0.001 <sup>a</sup> | 0.48 (0.38-0.61)             | <0.001 <sup>a</sup> |
| <b>Ideal</b>        | 128/3,001       | 0.13 (0.07-0.16)         | <0.001 <sup>a</sup> | 0.18 (0.14-0.24)             | <0.001 <sup>a</sup> |

\*Adjusted for gender, age, marital status, income, and education; MI= Myocardial infarction; LS7=Life's simple 7; OR=odds ratio; CI =confidence interval; <sup>a</sup> indicates statistically significant.

Table 4b. Relationships of Life's Simple 7 composite score levels and coronary heart disease (CHD).

| <b>LS7 Metrics</b>  | <b>CHD Cases</b> | <b>Crude OR (95% CI)</b> | <b>P-value</b>      | <b>*Adjusted OR (95% CI)</b> | <b>P-value</b>      |
|---------------------|------------------|--------------------------|---------------------|------------------------------|---------------------|
| <b>Poor</b>         | 133/649          | referent                 | referent            | referent                     | referent            |
| <b>Intermediate</b> | 269/2,287        | 0.51 (0.41-0.65)         | <0.001 <sup>a</sup> | 0.53 (0.40-0.68)             | <0.001 <sup>a</sup> |
| <b>Ideal</b>        | 98/3,001         | 0.13 (0.09-0.17)         | <0.001 <sup>a</sup> | 0.19 (0.14-0.26)             | <0.001 <sup>a</sup> |

\*Adjusted for gender, age, marital status, income, and education; CHD= Coronary heart disease; LS7=Life's simple 7; OR=odds ratio; CI =confidence interval; <sup>a</sup> indicates statistically significant.

Table 4c. Relationships of Life's Simple 7 composite score levels and stroke.

| <b>LS7 Metrics</b>  | <b>Stroke Cases</b> | <b>Crude OR (95% CI)</b> | <b>P-value</b>      | <b>*Adjusted OR (95% CI)</b> | <b>P-value</b>      |
|---------------------|---------------------|--------------------------|---------------------|------------------------------|---------------------|
| <b>Poor</b>         | 94/670              | referent                 | referent            | referent                     | referent            |
| <b>Intermediate</b> | 212/2,308           | 0.62 (0.48-0.80)         | <0.001 <sup>a</sup> | 0.66 (0.49-0.88)             | 0.004 <sup>a</sup>  |
| <b>Ideal</b>        | 109/3,013           | 0.22 (0.17-0.31)         | <0.001 <sup>a</sup> | 0.32 (0.24-0.45)             | <0.001 <sup>a</sup> |

\*Adjusted for gender, age, marital status, income, and education; LS7=Life's simple 7; OR=odds ratio; CI=confidence interval; <sup>a</sup> indicates statistically significant.

Table 4d. Association between Life's Simple 7 composite score and myocardial infarction (MI) outcome.

| <b>MI</b>                  | <b>Crude OR (95% CI)</b> | <b>P-value</b>      | <b>*Adjusted OR (95% CI)</b> | <b>P-value</b>      |
|----------------------------|--------------------------|---------------------|------------------------------|---------------------|
| <b>LS7 composite score</b> | 0.61 (0.58-0.64)         | <0.001 <sup>a</sup> | 0.67 (0.63-0.71)             | <0.001 <sup>a</sup> |

\*Adjusted for gender, age, marital status, income, and education; MI= Myocardial infarction; LS7=Life's simple 7; OR=odds ratio; CI=confidence interval; <sup>a</sup> indicates statistically significant.

Table 4e. Association between Life's Simple 7 composite score and coronary heart disease (CHD) outcome.

| <b>CHD</b>                 | <b>Crude OR (95% CI)</b> | <b>P-value</b>      | <b>*Adjusted OR (95% CI)</b> | <b>P-value</b>      |
|----------------------------|--------------------------|---------------------|------------------------------|---------------------|
| <b>LS7 composite score</b> | 0.63 (0.59-0.66)         | <0.001 <sup>a</sup> | 0.69 (0.64-0.74)             | <0.001 <sup>a</sup> |

\*Adjusted for gender, age, marital status, income, and education; CHD= coronary heart disease; LS7=Life's simple 7; OR=odds ratio; CI=confidence interval; <sup>a</sup> indicates statistically significant.

Table 4f. Association between Life's Simple 7 composite score and stroke outcome.

| <b>Stroke</b>              | <b>Crude OR (95% CI)</b> | <b>P-value</b>      | <b>*Adjusted OR (95% CI)</b> | <b>P-value</b>      |
|----------------------------|--------------------------|---------------------|------------------------------|---------------------|
| <b>LS7 composite score</b> | 0.67 (0.63-0.70)         | <0.001 <sup>a</sup> | 0.73 (0.68-0.78)             | <0.001 <sup>a</sup> |

\*Adjusted for gender, age, marital status, income, and education; LS7=Life's simple 7; OR=odds ratio; CI=confidence interval; <sup>a</sup> indicates statistically significant.
